# Supplementary material for: Synthesis and characterization of a Sb(v)-containing polyoxomolybdate serving as a catalyst for sulfoxidation
Source: Royal Society of Chemistry journal article supplement (doi:10.1039/c8dt01273c), 2018-01-01
Supplement: c8dt01273c1.pdf [file c8dt01273c1.pdf]

## Supporting information

### Synthesis, characterization of a Sb(V)-containing polyoxomolybdate serving as a catalyst for sulfoxidation

Jingkun Lu, Yaping Wang, Xinyi Ma, Yanjun Niu, Vikram Singh, Pengtao Ma, Chao Zhang, Jingyang Niu\* and Jingping Wang\*

*Henan Key Laboratory of Polyoxometalate Chemistry, Institute of Molecular and Crystal Engineering, College of Chemistry and Chemical Engineering, Henan University, Kaifeng, Henan 475004 P.R. China*

E-mail address: [jyniu@henu.edu.cn](mailto:jyniu@henu.edu.cn), [jpwang@henu.edu.cn](mailto:jpwang@henu.edu.cn)

Fax: (+86)371-23886876.

## CONTENTS

Section 1 The bond valence sum calculations

Section 2 Selected bond lengths

Section 3 Additional structural figures

Section 4 Additional measurements

Section 5 Catalytic properties

### Section 1 The bond valence sum calculations

**Table S1** The BVS calculations of all oxygen atoms in polyoxoanion.

| Atom | BVS  | Atom | BVS  |
|------|------|------|------|
| O1   | 0.92 | O7   | 1.23 |
| O2   | 1.87 | O8   | 1.07 |
| O3   | 1.70 | O9   | 1.06 |
| O4   | 1.74 | Sb1  | 5.27 |
| O5   | 1.26 | Mo1  | 6.03 |
| O6   | 1.72 | Mo2  | 5.99 |

### Section 2 Selected bond lengths

**Table S2** Selected bond length (Å) of compound **1**

| Bond                     | Length   | Bond                     | Length   |
|--------------------------|----------|--------------------------|----------|
| Sb(1)–O(5)               | 1.985(9) | Mo(1)–O(5)               | 2.277(6) |
| Sb(1)–O(5) <sup>#1</sup> | 1.985(9) | Mo(1)–O(6)               | 1.706(6) |
| Sb(1)–O(7) <sup>#1</sup> | 1.992(6) | Mo(1)–O(7)               | 2.285(6) |
| Sb(1)–O(7) <sup>#2</sup> | 1.992(6) | Mo(2)–O(2) <sup>#2</sup> | 1.926(6) |
| Sb(1)–O(7) <sup>#3</sup> | 1.992(6) | Mo(2)–O(2)               | 1.926(6) |
| Sb(1)–O(7)               | 1.992(6) | Mo(2)–O(3) <sup>#2</sup> | 1.711(6) |
| Mo(1)–O(1)               | 1.938(4) | Mo(2)–O(3)               | 1.711(6) |
| Mo(1)–O(2)               | 1.938(6) | Mo(2)–O(7)               | 2.296(6) |
| Mo(1)–O(4)               | 1.702(6) | Mo(2)–O(7) <sup>#2</sup> | 2.296(6) |

<sup>#1</sup>-X, 1-Y, -Z; <sup>#2</sup>+X, 1-Y, -Z; <sup>#3</sup>-X, +Y, +Z;

### Section 3 Additional structural figures

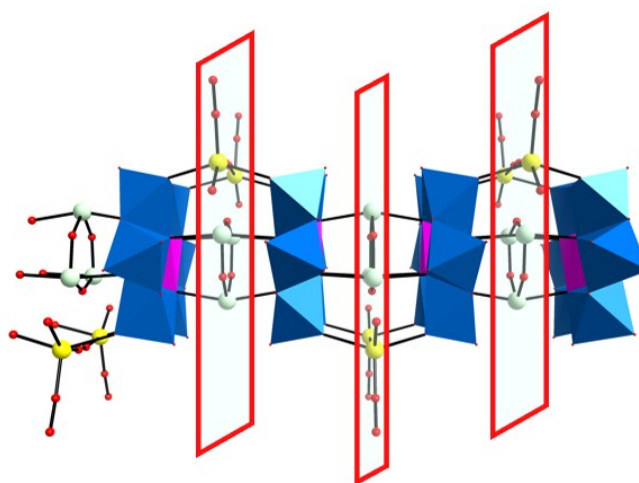

Fig. S1 The mirror-symmetry representation of adjacent Anderson-type {SbMo<sub>6</sub>} units.

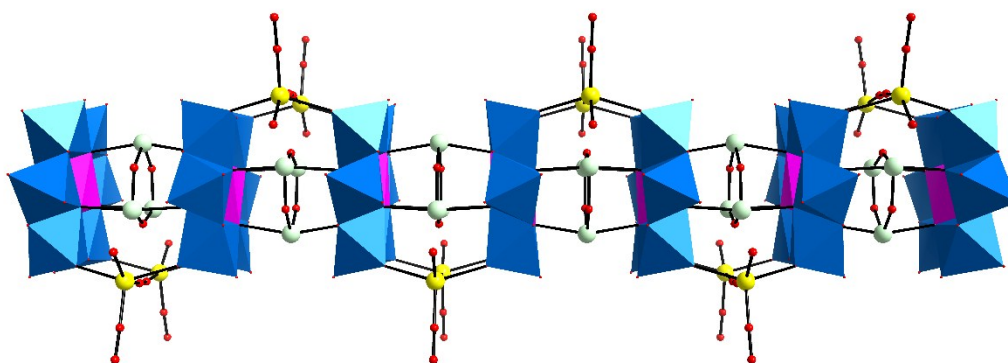

**Fig. S2** The polyhedral and ball-and-stick representation of polyanion of **1** along the *a* direction. Color cod: Sb, cyan; SbNa, turquoise; Mo, purple, O, red, Na, yellow.

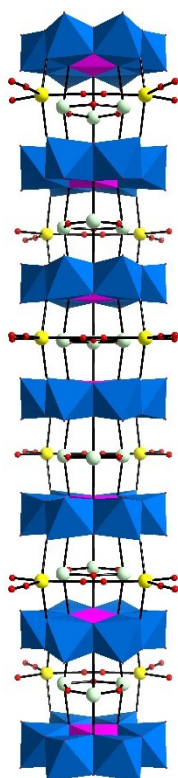

**Fig. S3** The polyhedral and ball-and-stick representation of polyanion of **1** along the *b* direction. Color cod: Sb, cyan; SbNa, turquoise; Mo, purple, O, red, Na, yellow.

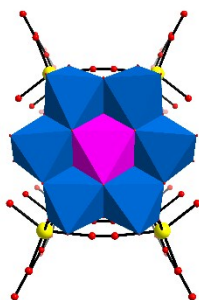

**Fig. S4** The polyhedral and ball-and-stick representation of polyanion of **1** along the *c* direction. Color cod: Sb, cyan; SbNa, turquoise; Mo, purple, O, red, Na, yellow.

## Section 4 Additional measurements

### 4.1 X-ray powder patterns

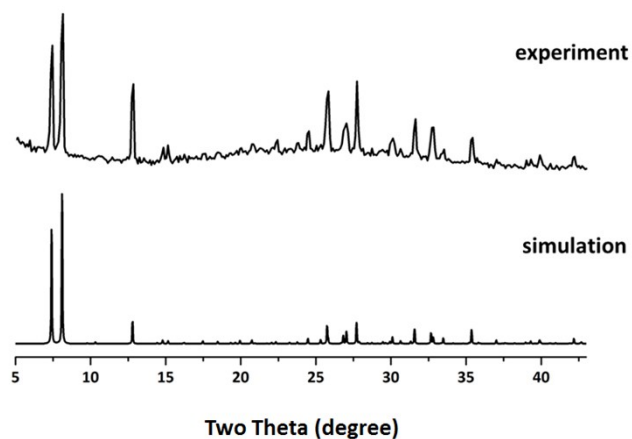

**Fig. S5** The XPRD patterns for experiment (top) and simulated (bottom) of **1**.

### 4.2 IR Spectrum

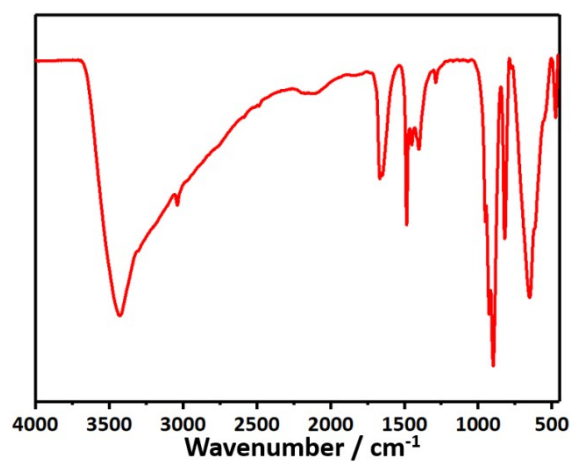

**Fig. S6** The IR spectrum of compound **1**.

### 4.3 Thermogravimetric analysis

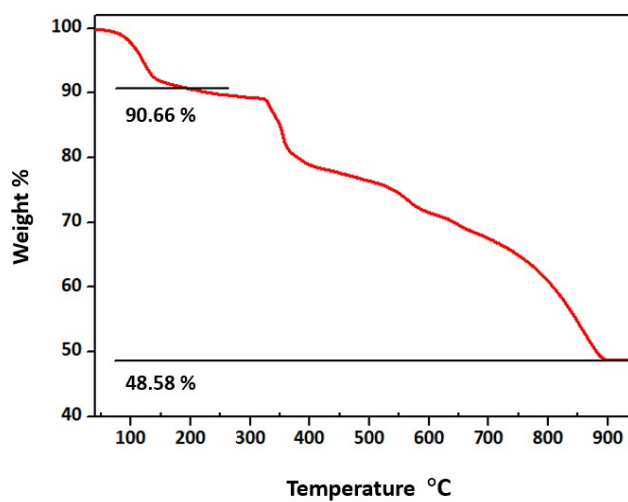

**Fig. S7** Thermogravimetric curve of **1**.

## Section 5 Catalytic properties

**Table S3** Oxidation of sulfides with different catalysts <sup>a</sup>

| Entry          | Catalyst                                                                           | H <sub>2</sub> O <sub>2</sub> <sup>b</sup> | Con. <sup>c</sup><br>(%) | Sel.<br>(%) |
|----------------|------------------------------------------------------------------------------------|--------------------------------------------|--------------------------|-------------|
| 1 <sup>d</sup> | /                                                                                  |                                            | 8.3                      | 13.2        |
| 2              | Sb <sub>2</sub> O <sub>3</sub>                                                     |                                            | 3.9                      | 0           |
| 3              | Sb <sub>2</sub> O <sub>5</sub>                                                     |                                            | 7.9                      | 0           |
| 4              | (NH <sub>4</sub> ) <sub>6</sub> Mo <sub>7</sub> O <sub>24</sub> ·4H <sub>2</sub> O |                                            | 55.6                     | 68.9        |
| 5              | Na <sub>2</sub> MoO <sub>4</sub> ·2H <sub>2</sub> O                                |                                            | 34.4                     | 29          |
| 6              | H <sub>3</sub> PMo <sub>12</sub> O <sub>40</sub>                                   | 3                                          | 5.8                      | 6.4         |
| 7              | H <sub>4</sub> SiMo <sub>12</sub> O <sub>40</sub>                                  |                                            | 80.3                     | 54.4        |
| 8              | H <sub>6</sub> As <sub>2</sub> Mo <sub>18</sub> O <sub>62</sub>                    |                                            | 3.4                      | 100         |
| 9              | H <sub>3</sub> PW <sub>12</sub> O <sub>40</sub>                                    |                                            | 4.9                      | 7.5         |
| 10             | H <sub>4</sub> GeW <sub>12</sub> O <sub>40</sub>                                   |                                            | 4.5                      | 9.1         |
| 11             | H <sub>4</sub> SiW <sub>12</sub> O <sub>40</sub>                                   |                                            | 4.6                      | 8.6         |
| 12             | Compound <b>1</b>                                                                  |                                            | 100                      | 100         |

<sup>a</sup> Reaction conditions: catalyst (0.5 mol%), substrate (1 mmol), H<sub>2</sub>O (3 mL), 1 h, 25 °C.

<sup>b</sup> H<sub>2</sub>O<sub>2</sub>/substrate ratio. <sup>c</sup> Determined by GC analyses based on initial substrate. <sup>d</sup> Blank experiment.

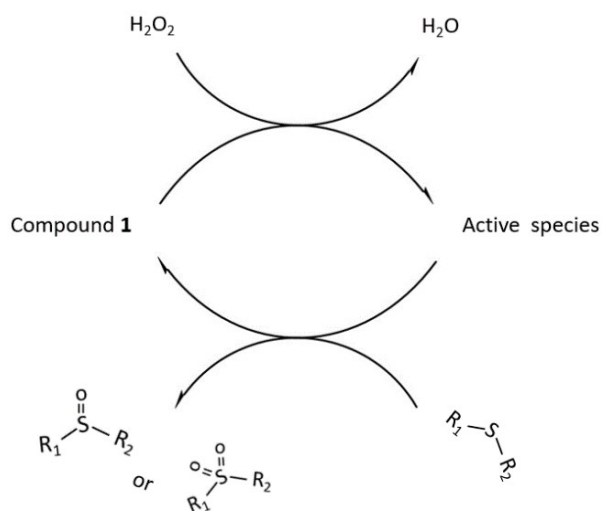

**Fig. S8** Proposed mechanism for the POM-catalyzed oxidation of sulfides in water.

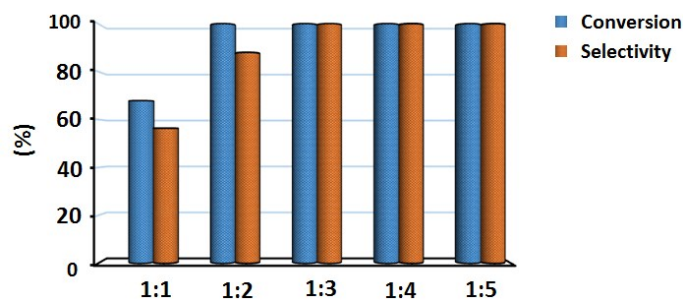

**Fig. S9** Effect of different H<sub>2</sub>O<sub>2</sub>/ substrate molar ratios on the catalytic oxidation of thioanisole.

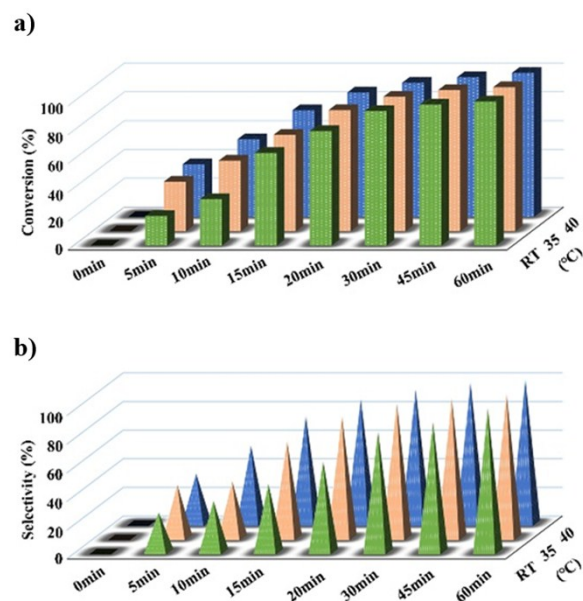

**Fig. S10** (a, b) Effect of temperature on the catalytic oxidation of thioanisole.

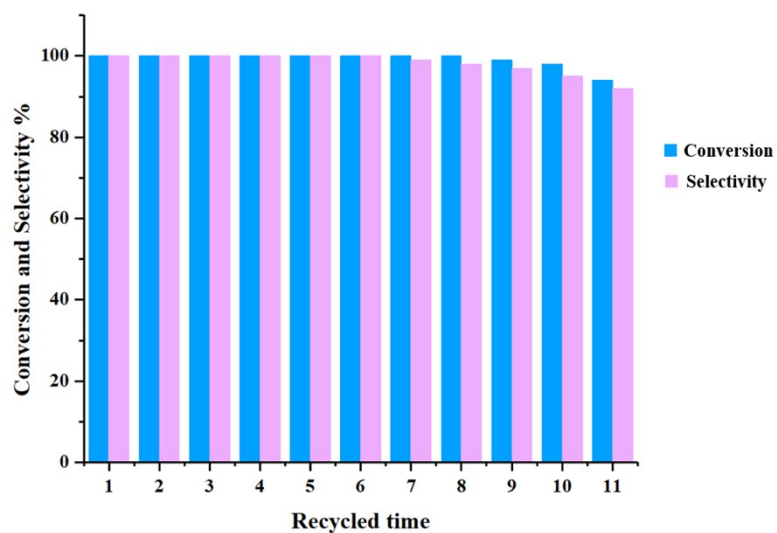

**Fig. S11** Recyclability of the catalyst **1** for the oxidation of thioanisole. Reaction conditions: Catalyst (5  $\mu\text{mol}$ ), thioanisole (1 mmol),  $\text{H}_2\text{O}_2$  (3 mmol),  $\text{H}_2\text{O}$  (3 mL), 25  $^\circ\text{C}$ , 1 h.
